# Supplementary material
Source: publisher site journal article supplement (https://www.dovepress.com/article/265356)
Supplement: Supplementary file 1 [file get_supplementary_file.php]

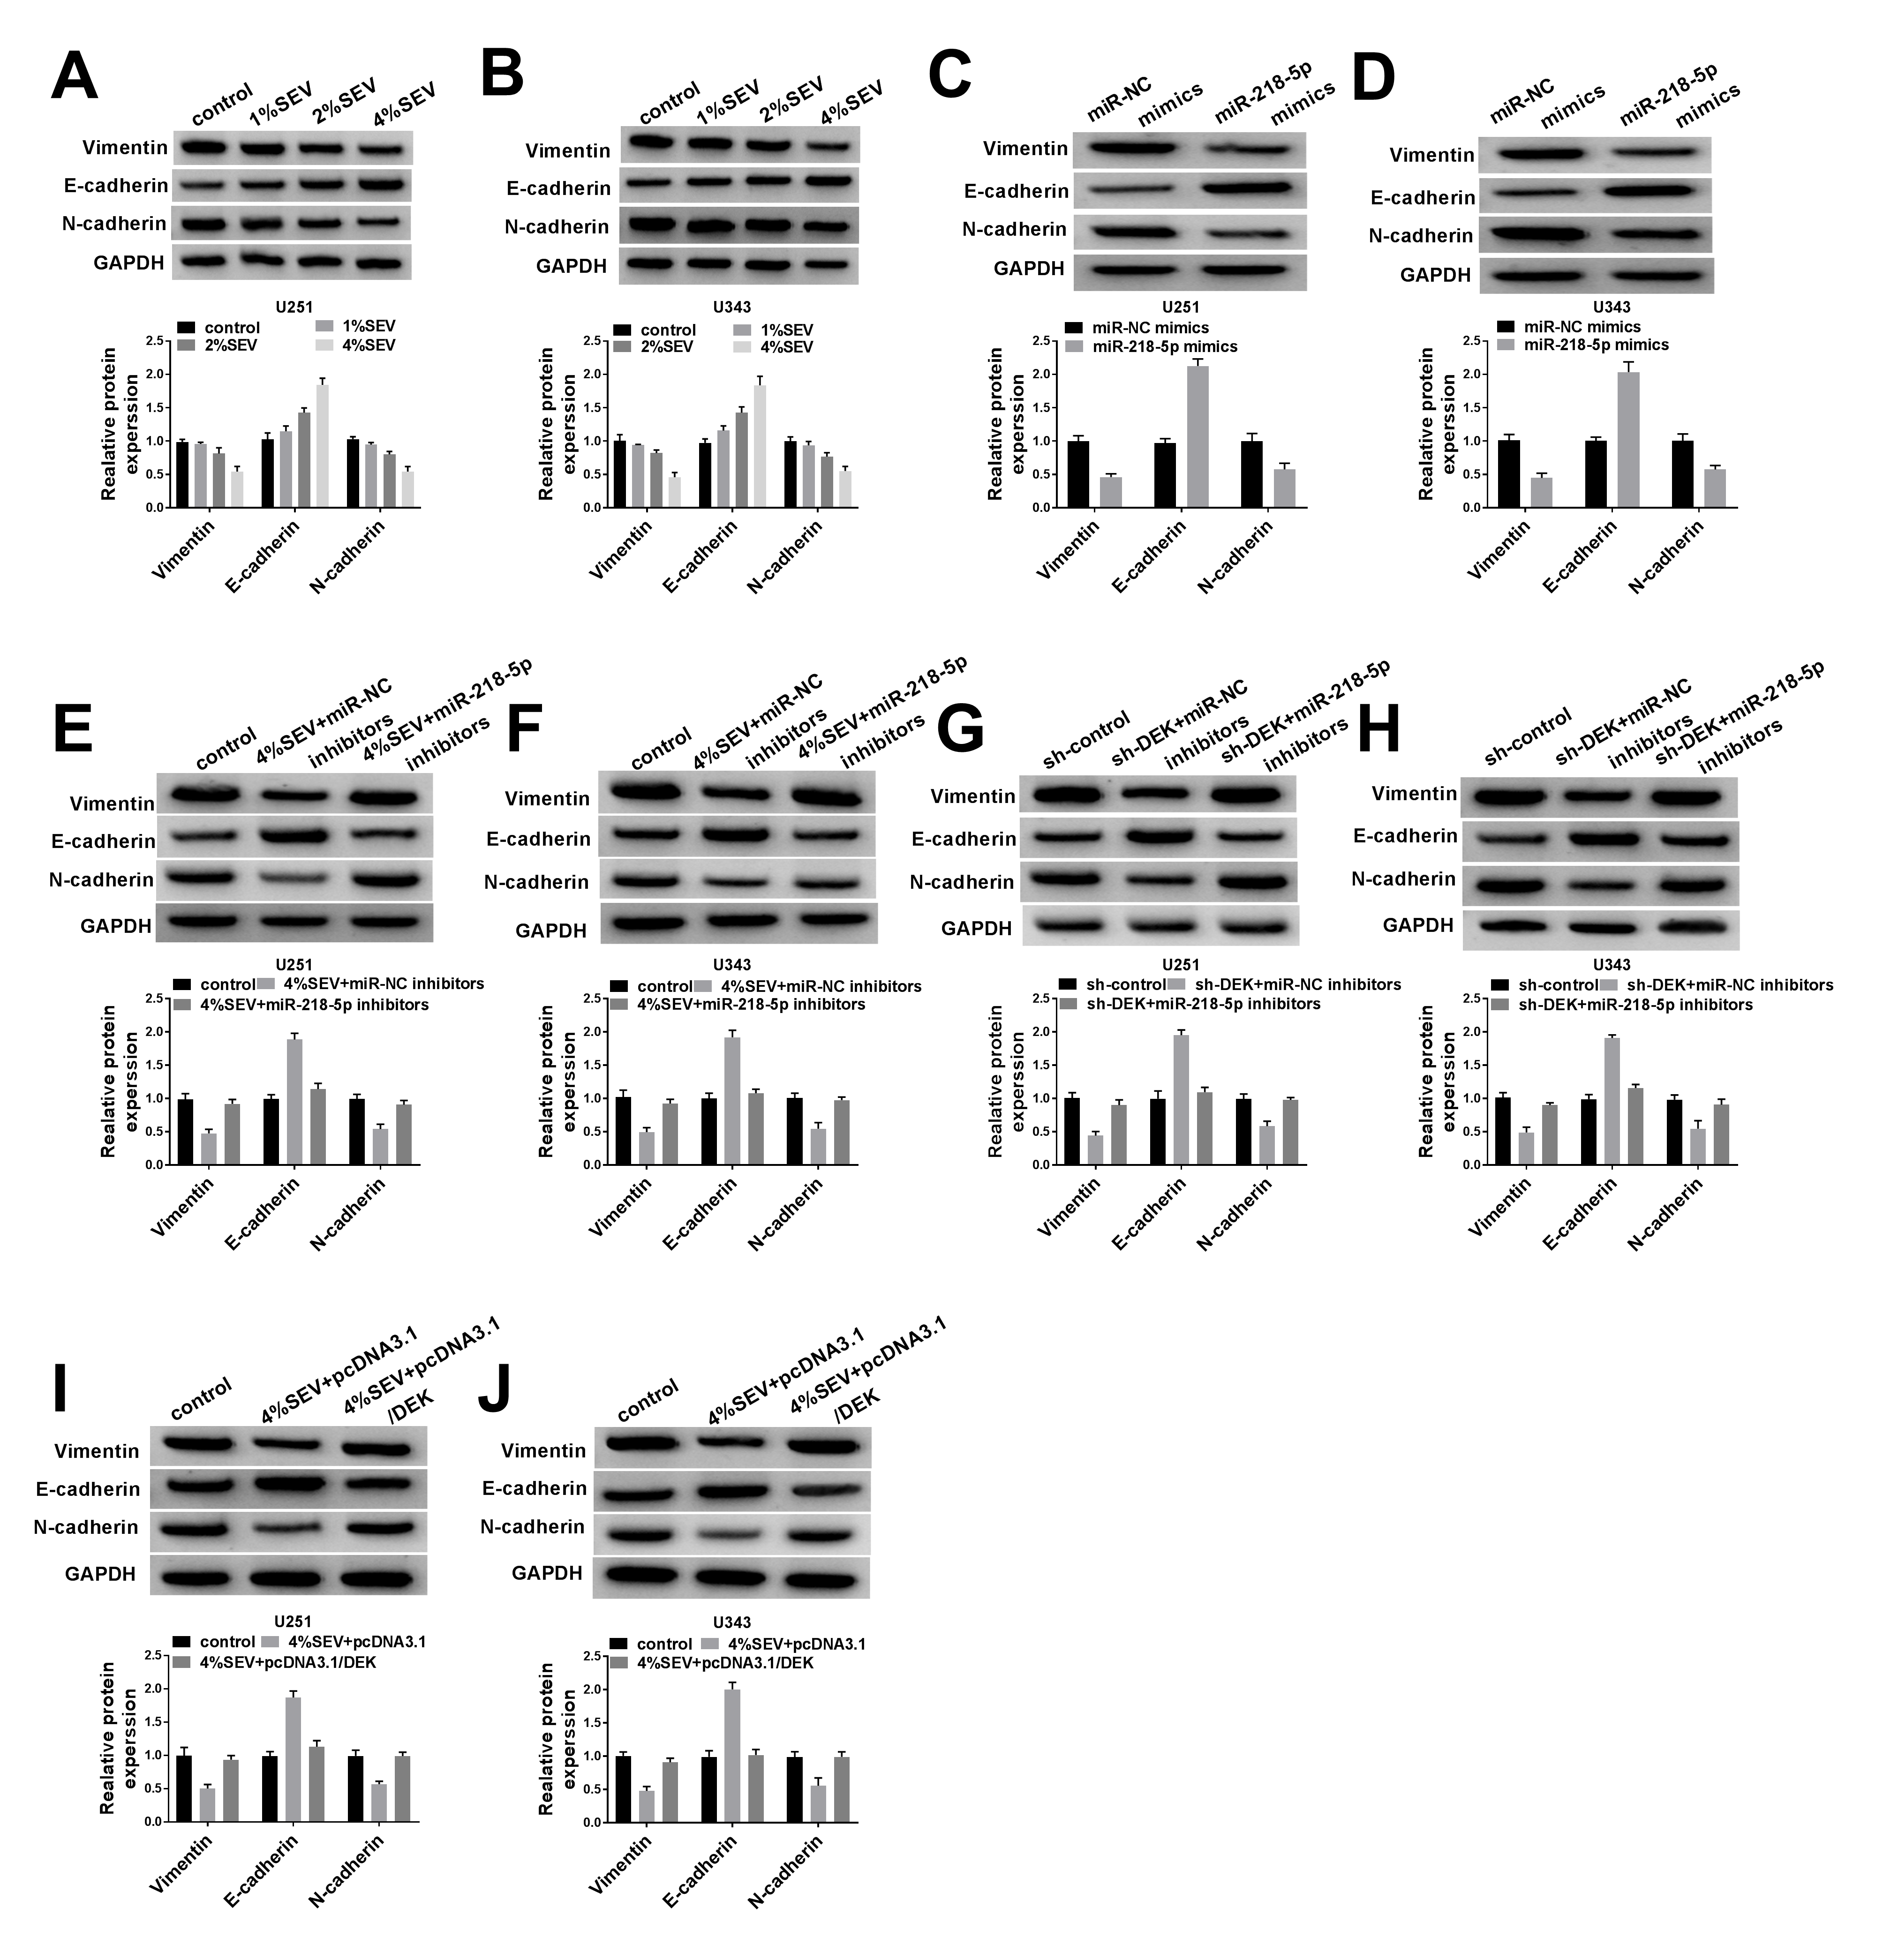
**Supplementary figure 1**. **(A-B)** The expression levels of EMT-related proteins (E-cadherin, N-cadherin and Vimentin) after treatment of sevoflurane for various concentrations (1%, 2% or 4%) were measured by western blot assay in U251 and U343 cell lines. **(C-D)** The EMT-related proteins was analyzed after transfection with miR-NC mimics or miR-218-5p mimics in U251 and U343 cells. **(E-F)** The Vimentin, E-cadherin and N-cadherin expression levels were detected by western blot after transfection with 4%SEV+miR-NC inhibitors, 4%SEV+miR-218-5p inhibitors or control in glioma cells. **(G-H)** The related EMT proteins were measured after transfection with sh-control, sh-DEK+miR-NC inhibitors or sh-DEK+miR-218-5p inhibitors. **(I-J)** The vimentin, E-cadherin or N-cadherin expression levels were detected by western blot assay after transfection with 4%SEV+pcDNA3.1, 4%SEV+pcDNA3.1/DEK or control.

**
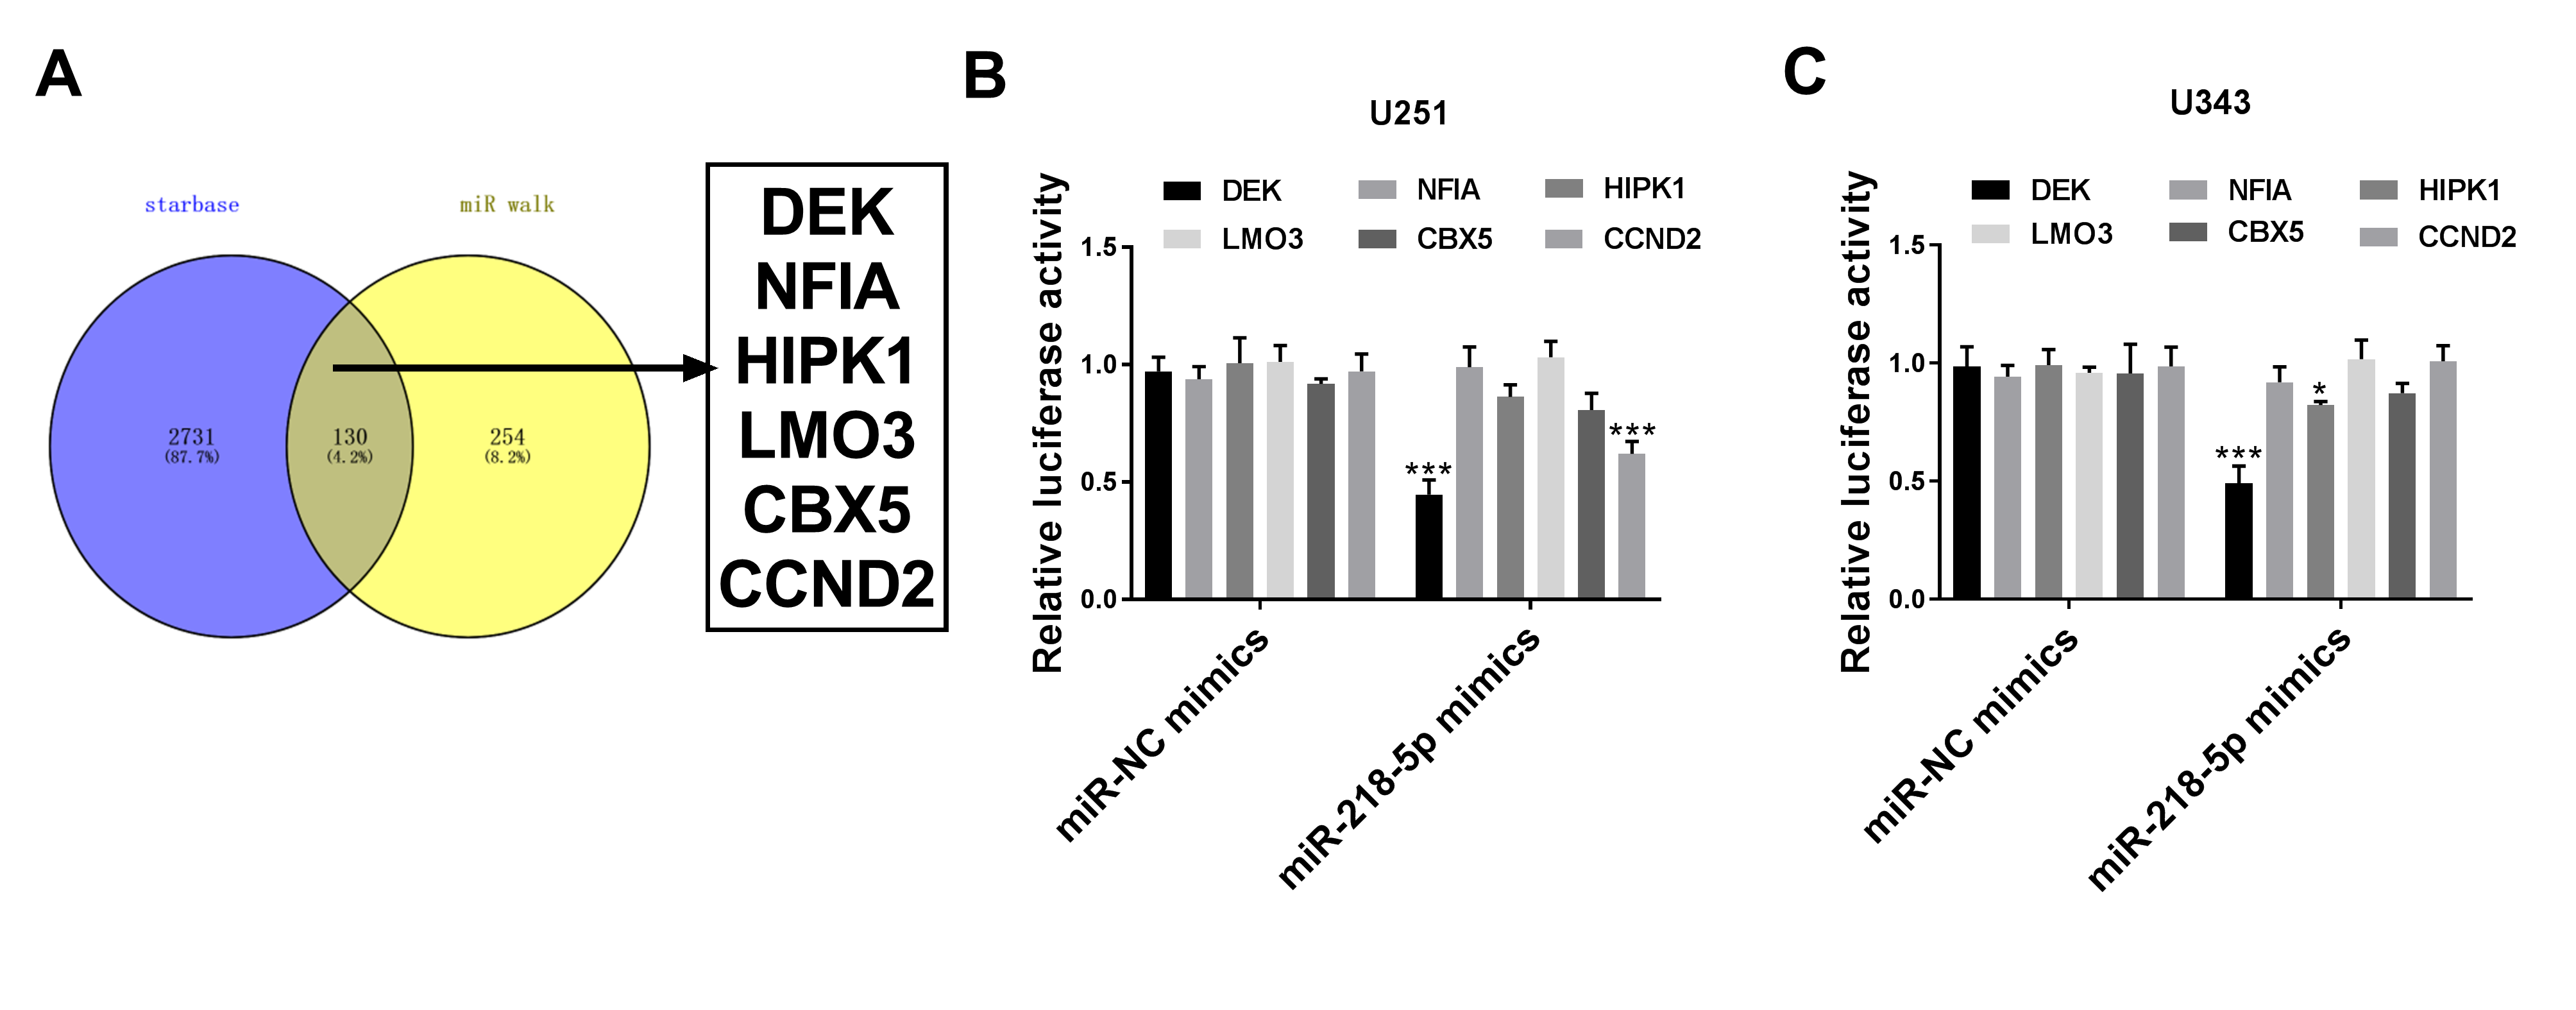
Supplementary figure 2**. **(A)** The target relationship between miR-218-5p and target genes was predicted by Starbase and miR walk software. **(B-C)** Dual luciferase reporter assay was utilized to confirm the target relationships between miR-218-5p and DEK, NFIA, HIPK1, LMO3, CBX5 or CCND2 in U251 and U343 cells. **P*<0.05. ****P*<0.001.


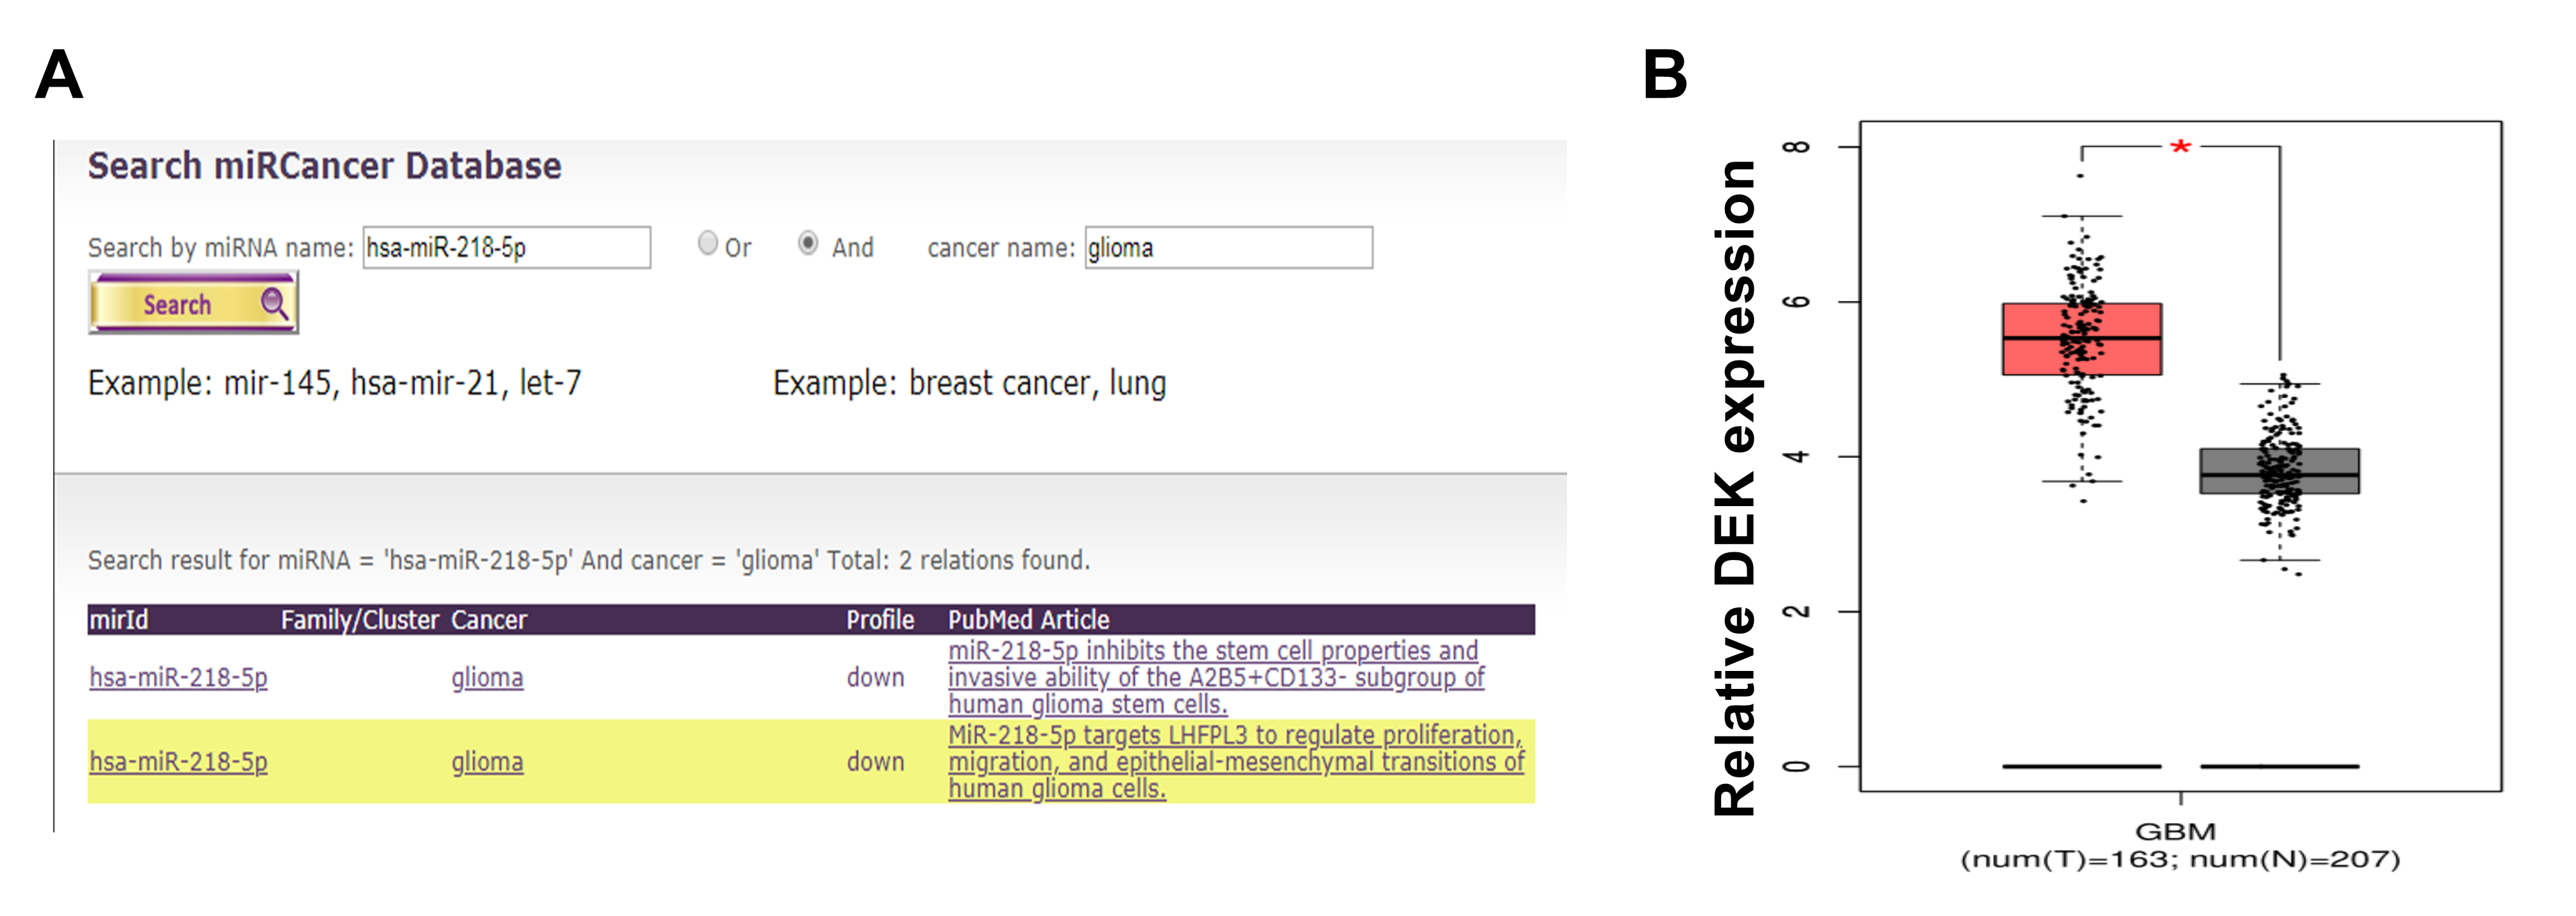


**Supplementary figure 3**. **(A-B)** The expression level of DEK in glioma tissues was shown in miRCancer Database. **P*<0.05.
